# Supplementary material
Source: PubMed Central journal article supplement (PMC2726112)
Supplement: NIHMS95847-supplement-Figs.pdf [file NIHMS95847-supplement-Figs.pdf]

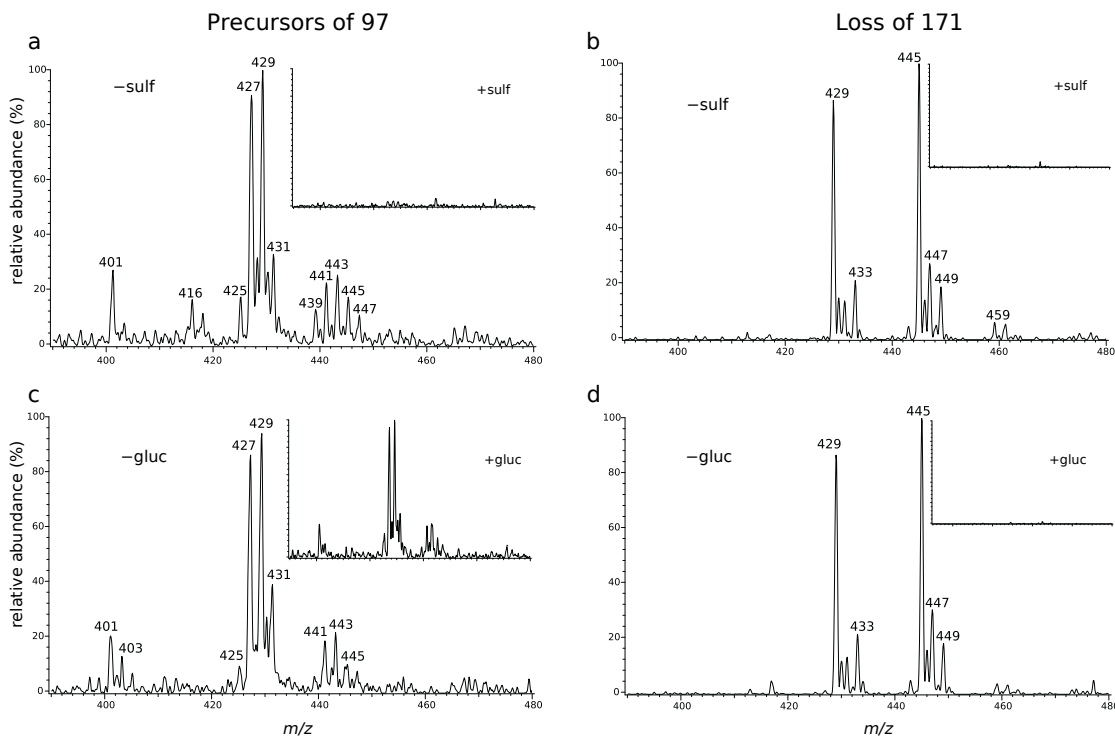

Fig. S1: Sulfates and glucuronidates in urine extracts and their enzymatic digestion. (A) Precursor ion scan for  $m/z$  97, showing the presence of multiple sulfate precursors in the mock-treated sample. Inset, precursor scan of sample digested with sulfatase. (B) Precursor scan for  $m/z$  97 in mock-treated sample and (inset) glucuronidase-treated sample. (C) Neutral loss scan of 176 (glucuronic acid) indicates the presence of multiple glucuronic acid conjugates. Inset, neutral loss scan after sulfatase digestion, demonstrating that sulfatase also contains glucuronidase activity. (D) Neutral loss 176 scan of mock-treated sample and (inset) glucuronidase-treated sample. (B) and (D) demonstrate that glucuronidase depletes the glucuronic acid conjugates but preserves the sulfated compounds. The samples used for precursor-ion and neutral-loss scans were from ODS-urine extracts dissolved in methanol at a concentration of  $20\times$  relative to urine.

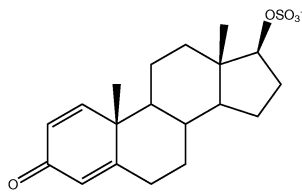

A0225

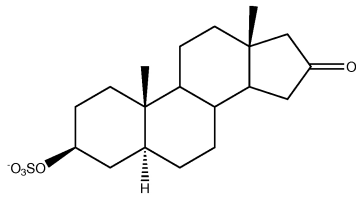

A2398

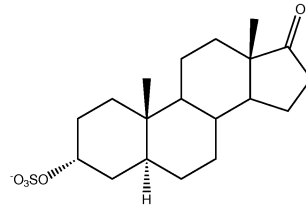

A2460

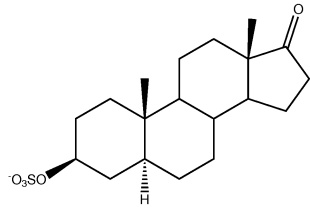

A2534

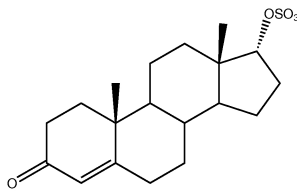

A6940

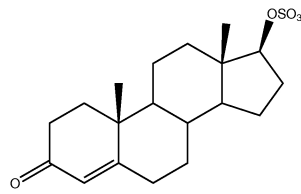

A7010

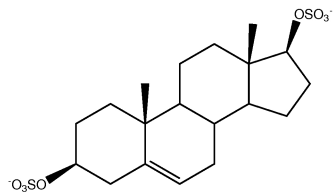

A7864

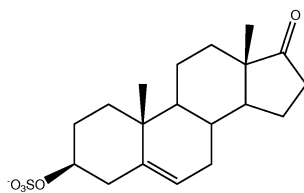

A8530

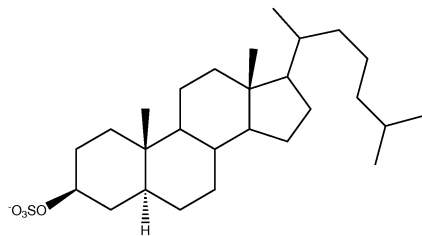

C4385

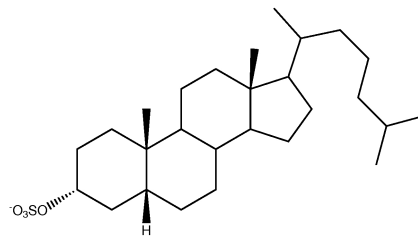

C5075

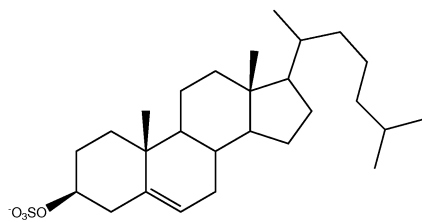

C6905

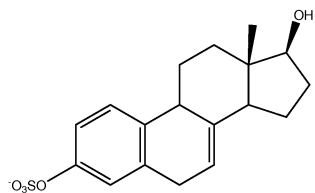

E0588

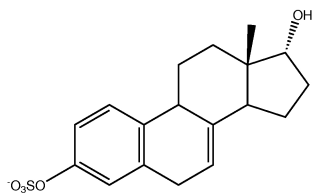

E0893

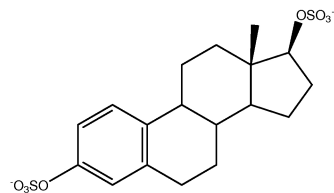

E1050

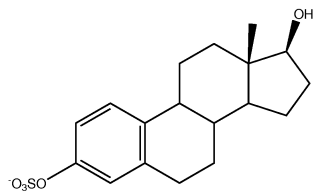

E1100

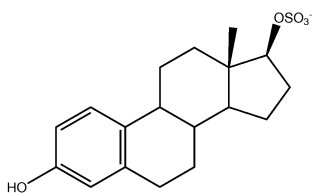

E1103

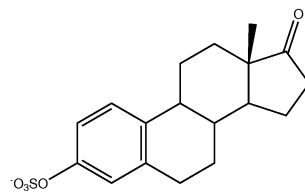

E2335

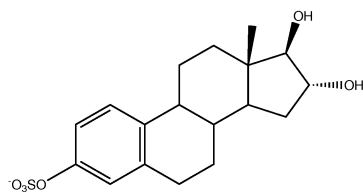

E2732

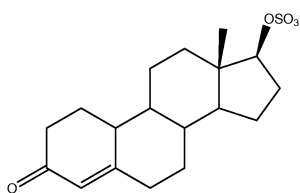

E4105

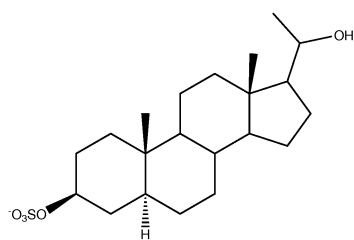

P2135

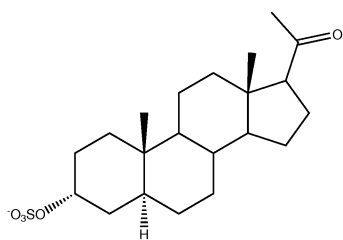

P3817

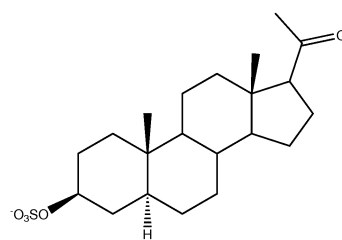

P3865

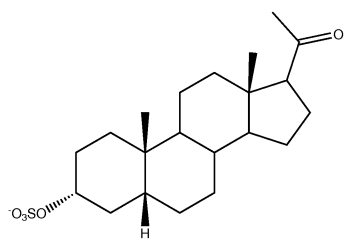

P8168

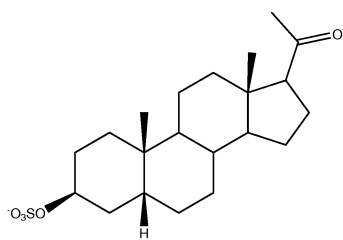

P8200

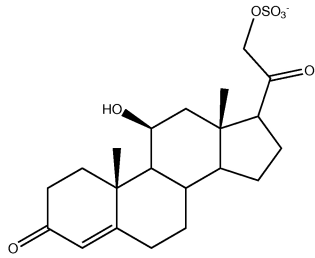

Q1570

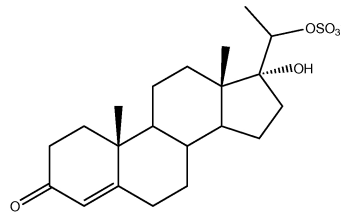

Q1890

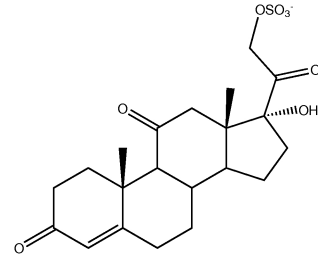

Q2525

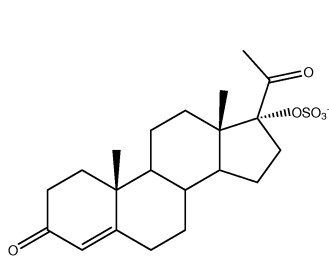

Q3383

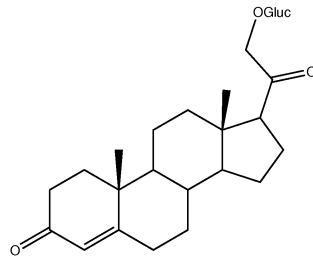

Q3470

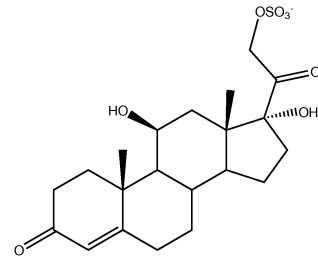

Q3910

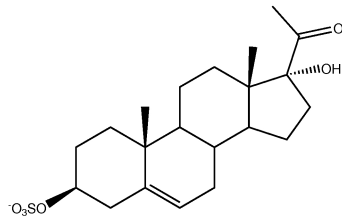

Q4765

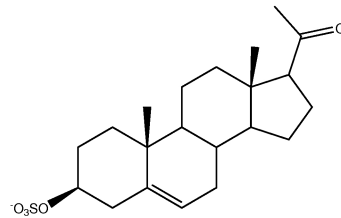

Q5545

A0225 1, 4-ANDROSTADIEN-17 $\beta$ -OL-3-ONE SULPHATE

A2398 5 $\alpha$ -ANDROSTAN-3 $\beta$ -OL-16-ONE SULPHATE

A2460 5 $\alpha$ -ANDROSTAN-3 $\alpha$ -OL-17-ONE SULPHATE

A2534 5 $\alpha$ -ANDROSTAN-3 $\beta$ -OL-17-ONE SULPHATE

A6940 4-ANDROSTEN-17 $\alpha$ -OL-3-ONE SULPHATE

A7010 4-ANDROSTEN-17 $\beta$ -OL-3-ONE SULPHATE

A7864 5-ANDROSTEN-3 $\beta$ , 17 $\beta$ -DIOL DISULPHATE

A8530 5-ANDROSTEN-3 $\beta$ -OL-17-ONE SULPHATE

C4385 5 $\alpha$ -CHOLESTAN-3 $\beta$ -OL SULPHATE

C5075 5 $\beta$ -CHOLESTAN-3 $\alpha$ -OL SULPHATE  
C6905 5-CHOLESTEN-3 $\beta$ -OL SULPHATE  
E0588 1, 3, 5(10), 7-ESTRATETRAEN-3, 17 $\beta$ -DIOL 3-SULPHATE  
E0893 1, 3, 5(10)-ESTRATRIEN-3, 17 $\alpha$ -DIOL 3-SULPHATE  
E1050 1, 3, 5(10)-ESTRATRIEN-3, 17 $\beta$ -DIOL DISULPHATE  
E1100 1, 3, 5(10)-ESTRATRIEN-3, 17 $\beta$ -DIOL 3-SULPHATE  
E1103 1, 3, 5(10)-ESTRATRIEN-3, 17 $\beta$ -DIOL 17-SULPHATE  
E2335 1, 3, 5(10)-ESTRATRIEN-3-OL-17-ONE SULPHATE  
E2732 1, 3, 5(10)-ESTRATRIEN-3, 16 $\alpha$ , 17 $\beta$ -TRIOL 3-SULPHATE  
E4105 4-ESTREN-17 $\beta$ -OL-3-ONE SULPHATE  
P2135 5 $\alpha$ -PREGNAN-3 $\beta$ , 20 $\beta$ -DIOL-3-SULPHATE  
P3817 5 $\alpha$ -PREGNAN-3 $\alpha$ -OL-20-ONE SULPHATE  
P3865 5 $\alpha$ -PREGNAN-3 $\beta$ -OL-20-ONE SULPHATE  
P8168 5 $\beta$ -PREGNAN-3 $\alpha$ -OL-20-ONE SULPHATE  
P8200 5 $\beta$ -PREGNAN-3 $\beta$ -OL-20-ONE SULPHATE  
Q1570 4-PREGNEN-11 $\beta$ , 21-DIOL-3, 20-DIONE 21-SULPHATE  
Q1890 4-PREGNEN-17, 20 $\beta$ -DIOL-3-ONE SULPHATE  
Q2525 4-PREGNEN-17, 21-DIOL-3, 11, 20-TRIONE 21-SULPHATE  
Q3383 4-PREGNEN-17-OL-3, 20-DIONE SULPHATE  
Q3470 4-PREGNEN-21-OL-3, 20-DIONE GLUCOSIDURONATE  
Q3910 4-PREGNEN-11 $\beta$ , 17, 21-TRIOL-3, 20-DIONE 21-SULPHATE  
Q4765 5-PREGNEN-3 $\beta$ , 17-DIOL-20-ONE 3-SULPHATE  
Q5545 5-PREGNEN-3 $\beta$ -OL-20-ONE SULPHATE

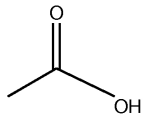

Acetic acid

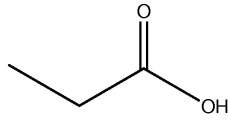

Propionic acid

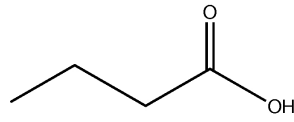

Butyric acid

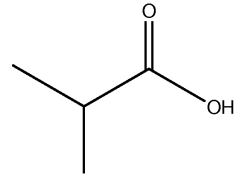

Isobutyric acid

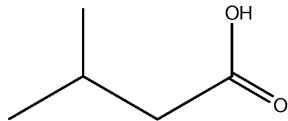

Isovaleric acid

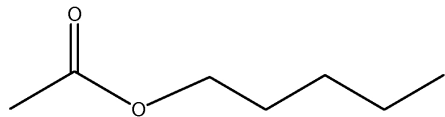

Pentyl acetate

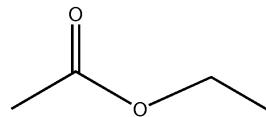

Ethyl acetate

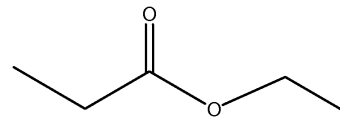

Ethyl propionate

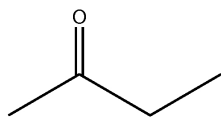

Butanone

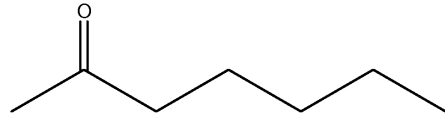

2-heptanone

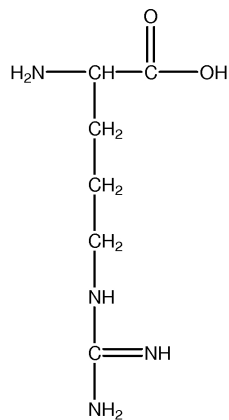

Arginine

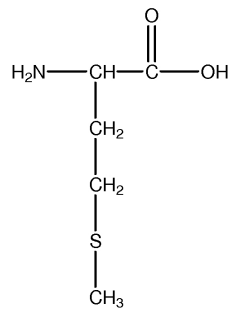

Methionine

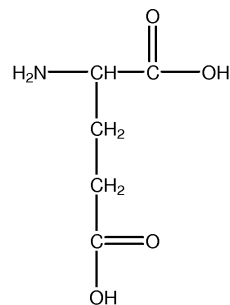

Glutamic acid

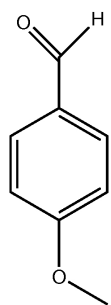

Aubepine

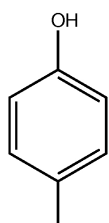

p-cresol

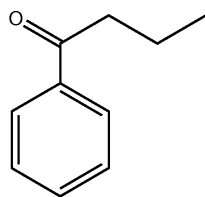

Butyrophenone

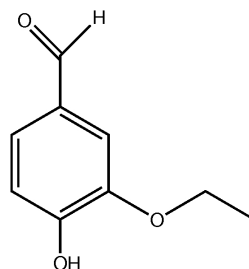

Ethyl vanilline

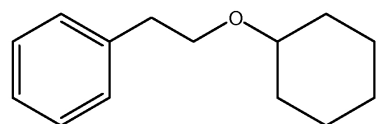

Phenafleur

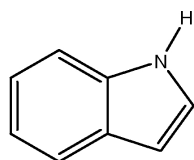

Indole

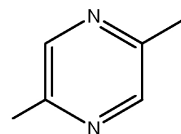

2,5-dimethylpyrazine

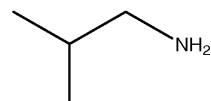

Isobutylamine

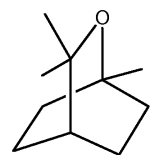

Eucalyptol

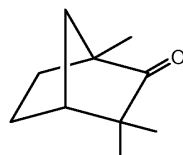

Fenchone

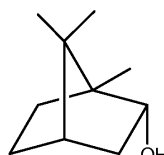

Borneol

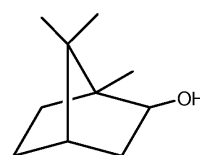

Isoborneol

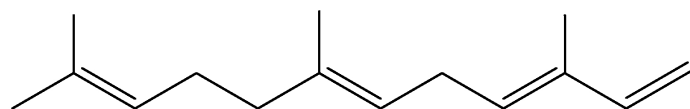

$\alpha$ -farnesene

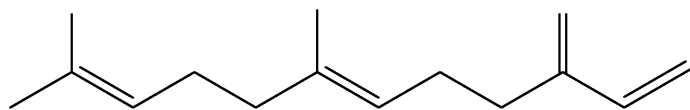

$\beta$ -farnesene

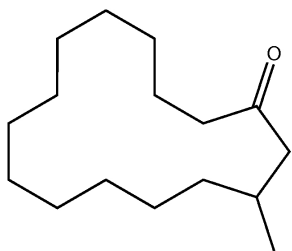

Muscone

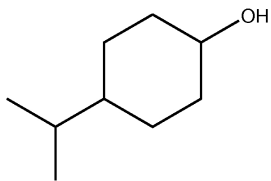

Patchone

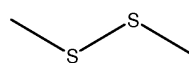

Dimethyl disulfide

Fig. S2. Structures of additional synthetic compounds tested.
